# Supplementary material for: Inhibition of Borrelia Burgdorferi-Induced TLR2-NFκB Canonical Signaling by Gallic Acid through Targeting the CD14+ Adaptor Protein and p65 Molecule
Source: MDPI journal article supplement (doi:10.3390/ijms231910987), 2022-09-20
Supplement: s1 [file s1]

## Supplementary Information

***Borrelia burgdorferi*-induced TLR2-NFκB canonical signaling is inhibited by gallic acid through targeting the CD14+ adaptor protein and p65 molecule**

Anna Goc<sup>1\*</sup>, Aleksandra Niedzwiecki<sup>1\*</sup>, Matthias Rath<sup>1</sup>

<sup>1</sup>Dr. Rath Research Institute, 5941 Optical Ct., San Jose, CA 95138, USA

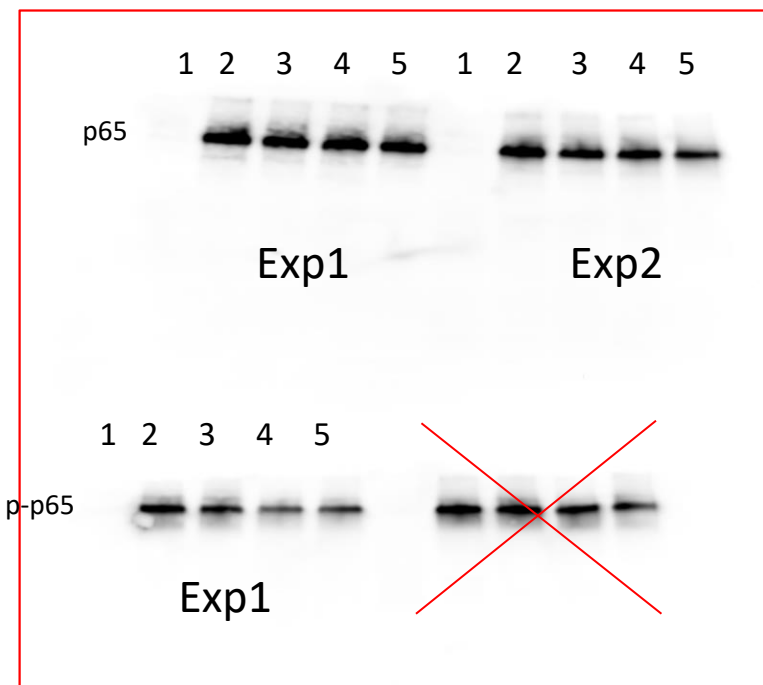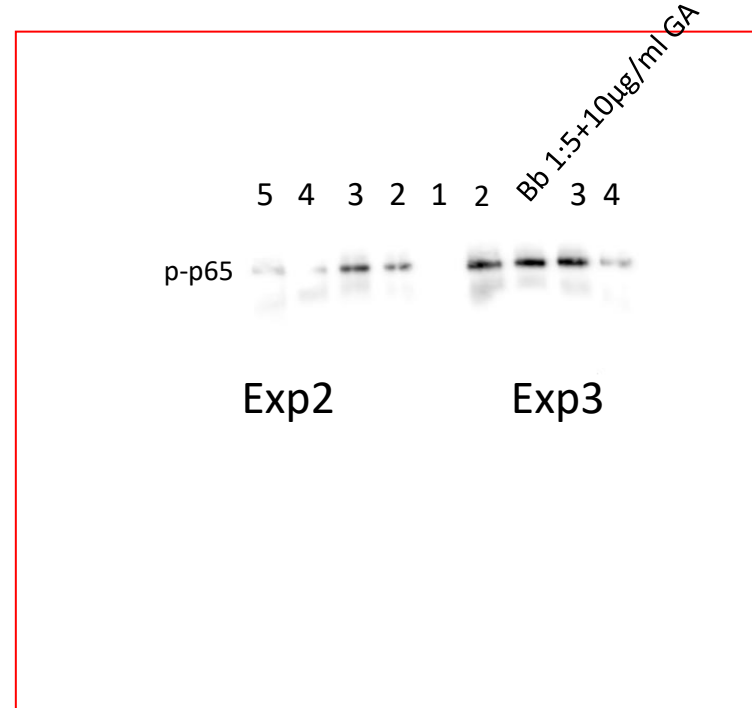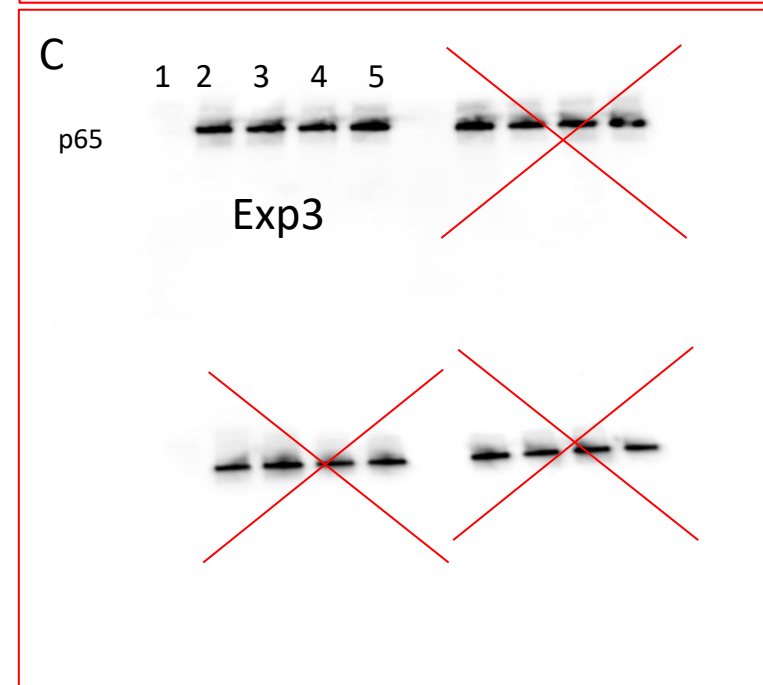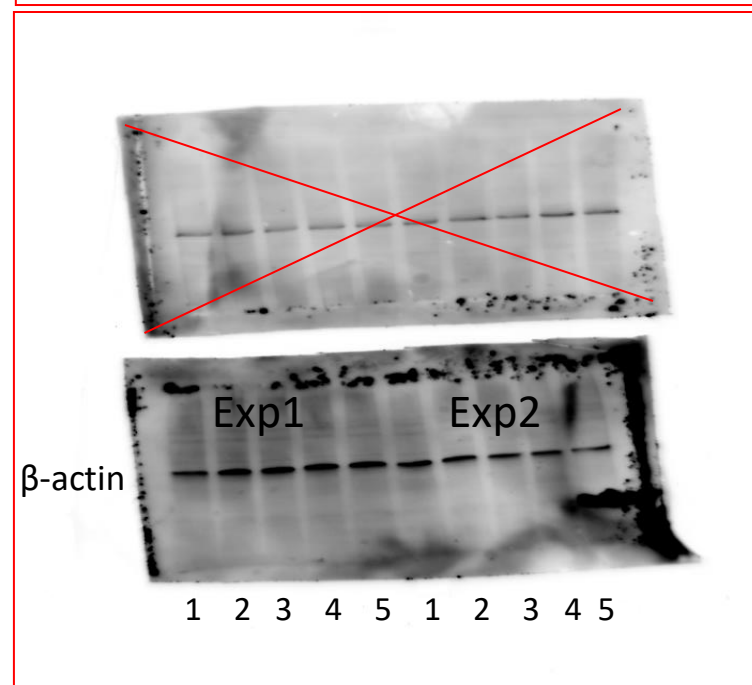

Figure S1a. Effect of gallic acid on NF $\kappa$ B canonical signaling pathway. Human CD14<sup>+</sup> monocytes were treated with gallic acid upon *Borrelia burgdorferi* 31 stimulation. Levels of proteins were assessed Western blot after 12 h post-treatment. 1 - control cells not stimulated with *Borrelia burgdorferi*; 2 - control cells stimulated with *Borrelia burgdorferi* at cells:bacteria 1:5 ratio; 3 - cells stimulated with *Borrelia burgdorferi* at cells:bacteria 1:5 and treated with gallic acid at 25  $\mu$ g/ml; 4 - cells stimulated with *Borrelia burgdorferi* at cells:bacteria 1:5 and treated with gallic acid at 50  $\mu$ g/ml; 5 - cells stimulated with *Borrelia burgdorferi* at cells:bacteria 1:5 and treated with gallic acid at 75  $\mu$ g/ml.

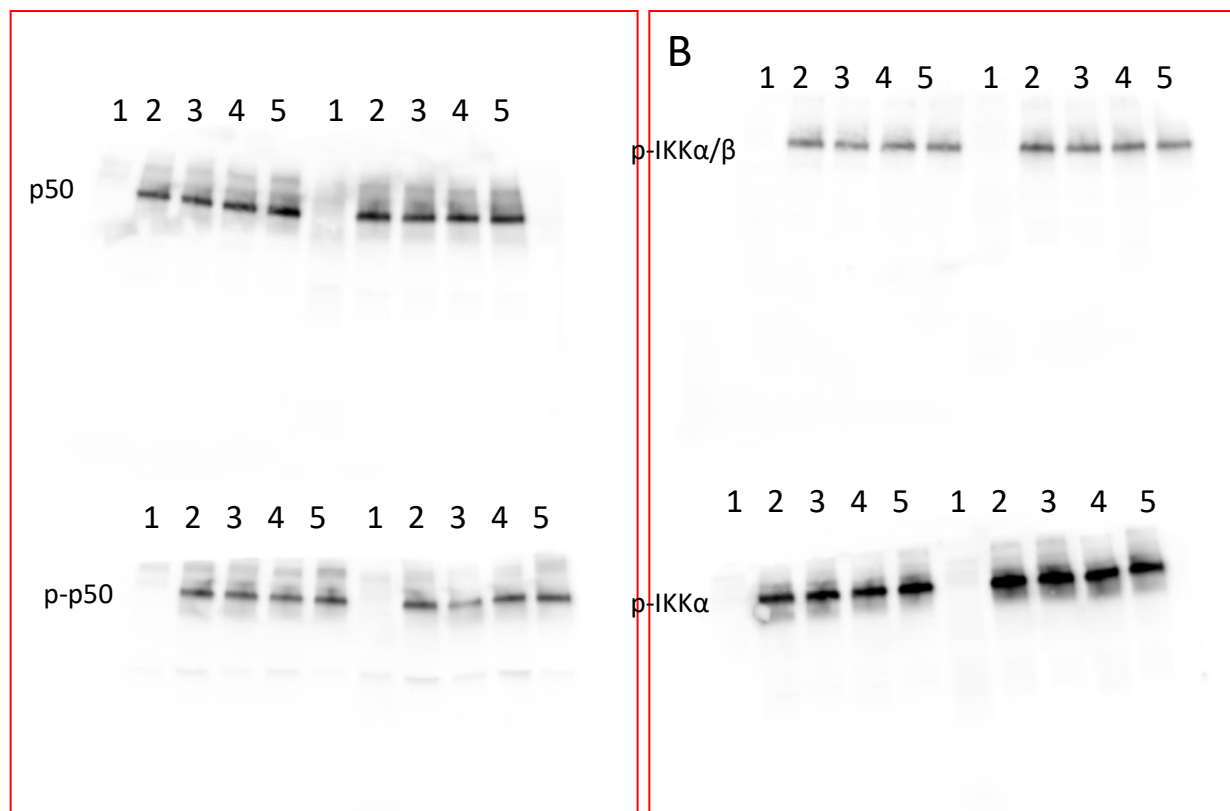

Figure S1b. Effect of gallic acid on NFκB canonical signaling pathway. Human CD14<sup>+</sup> monocytes were treated with gallic acid upon *Borrelia burgdorferi* 31 stimulation. Levels of proteins were assessed by Western blot after 12 h post-treatment. 1 - control cells not stimulated with *Borrelia burgdorferi*; 2 - control cells stimulated with *Borrelia burgdorferi* at cells:bacteria 1:5 ratio; 3 - cells stimulated with *Borrelia burgdorferi* at cells:bacteria 1:5 and treated with gallic acid at 25 μg/ml; 4 - cells stimulated with *Borrelia burgdorferi* at cells:bacteria 1:5 and treated with gallic acid at 50 μg/ml; 5 - cells stimulated with *Borrelia burgdorferi* at cells:bacteria 1:5 and treated with gallic acid at 75 μg/ml.

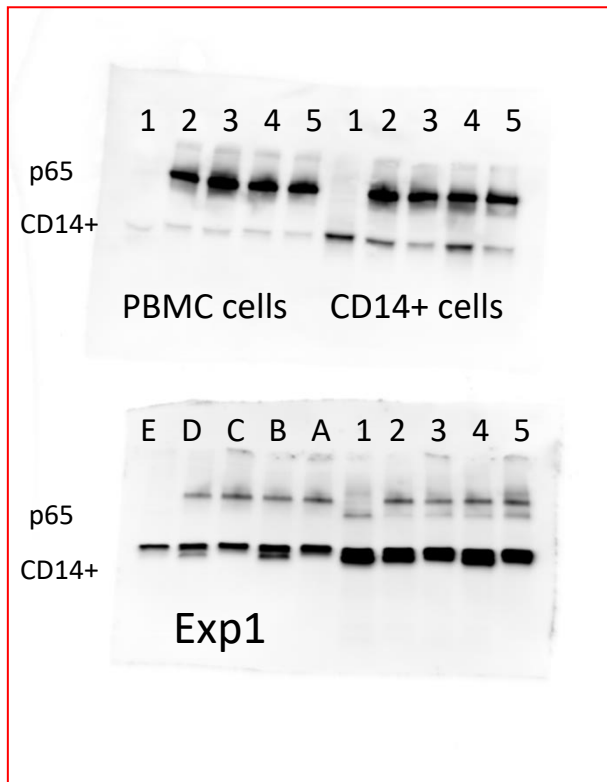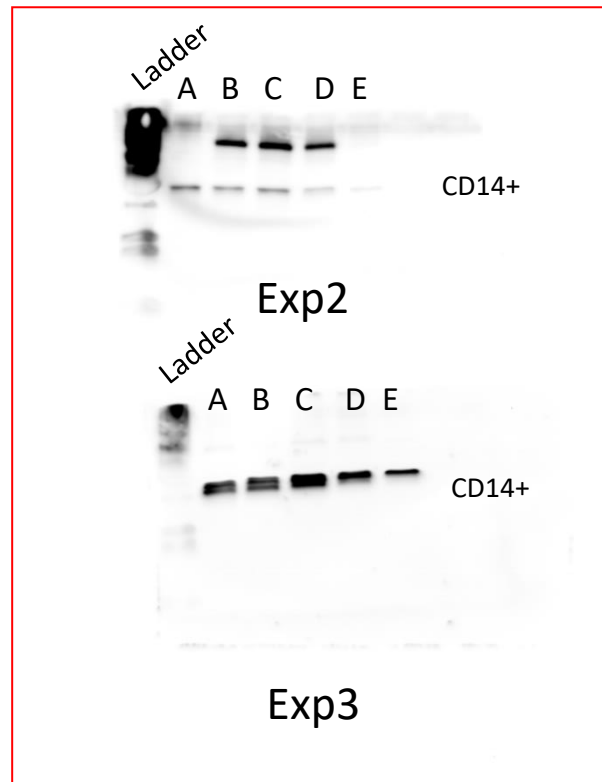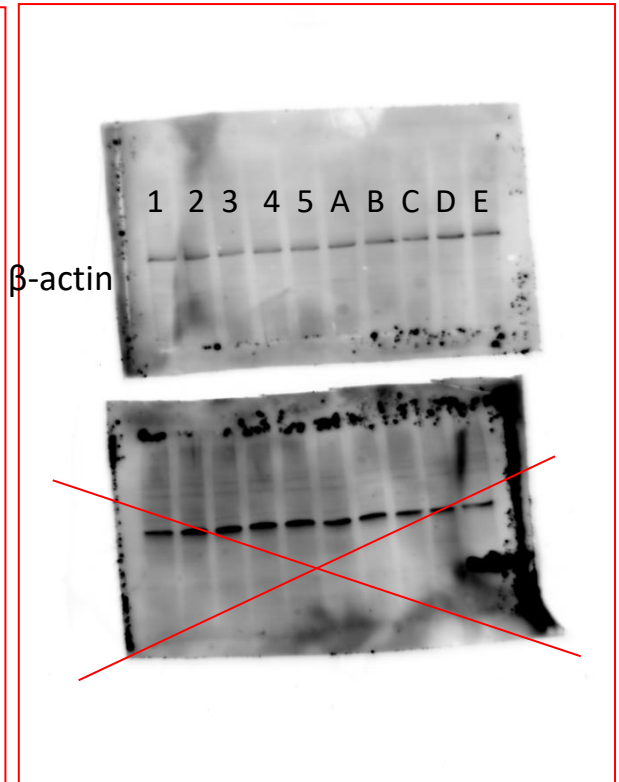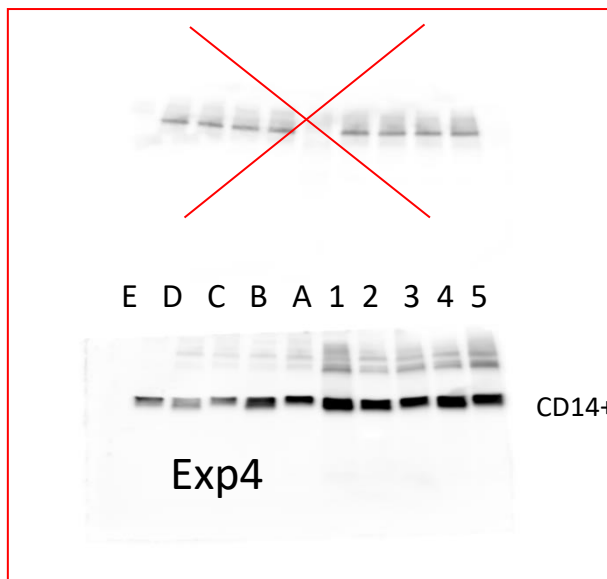

Figure S2. Effect of gallic acid on Toll-like receptor 2. Human CD14<sup>+</sup> monocytes were treated with gallic acid upon *Borrelia burgdorferi* 31 stimulation. Levels of proteins were assessed Western blot after 12 h post-treatment. 1 - control cells not stimulated with *Borrelia burgdorferi*; 2 - control cells stimulated with *Borrelia burgdorferi* at cells:bacteria 1:5 ratio; 3 - cells stimulated with *Borrelia burgdorferi* at cells:bacteria 1:5 and treated with gallic acid at 50  $\mu$ g/ml; 4 - cells stimulated with *Borrelia burgdorferi* at cells:bacteria 1:10; 5 - cells stimulated with *Borrelia burgdorferi* at cells:bacteria 1:10 and treated with gallic acid at 50  $\mu$ g/ml; A - control cells not stimulated with *Borrelia burgdorferi*; B - control cells stimulated with *Borrelia burgdorferi* at cells:bacteria 1:5 ratio; C - cells stimulated with *Borrelia burgdorferi* at cells:bacteria 1:5 and treated with gallic acid at 25  $\mu$ g/ml; D - cells stimulated with *Borrelia burgdorferi* at cells:bacteria 1:5 and treated with gallic acid at 50  $\mu$ g/ml; E - cells stimulated with *Borrelia burgdorferi* at cells:bacteria 1:5 and treated with gallic acid at 75  $\mu$ g/ml.
